# Supplementary material
Source: PubMed Central journal article supplement (PMC7610927)
Supplement: EMS126372-supplement-Supporting_information.pdf [file EMS126372-supplement-Supporting_information.pdf]

Supporting information

**Modulation of heme redox potential in the cytochrome  $c_6$  family**

Jonathan A.R. Worrall, Beatrix G. Schlarb-Ridley, Torsten Reda, Maria J. Marcaida, Robert J. Moorlen, Juergen Wastl, Judy Hirst, Derek S. Bendall, Ben F. Luisi and Christopher J. Howe.

## Materials and Methods

The sequence of the synthetic gene (including ribosomal binding site, in lower case) for the phormidium laminosum cyt  $c_6$  was:

```
aggaggtgaccATGAAAAAATTTTCTCTCTGGTGCTGCTGGGTATCGCGCTGTTCA  
CGTTCGCGTTCTCGTCCCCGGCGCTGGCGGACGCTGACCTGGCTACCGGTGCT  
AAAGTTTTCTCCGCTAACTGCGCTGCTTGCCACGCTGGTGGTATCAACCTGGT  
TAACGCTGAAAAACCCTGAAAAAGAAGCTCTGGAAAAATTCGGTATGAA  
CTCCATCGTTGCTATCACCACCCAGGTTACCAACGGTAAAGCTGGTATGCCG  
GCTTTCAAAGGTCGTCTGACCGACGACCAGATCGCTGCTGTTGCTGCTTACGT  
TCTGGACCAGGCTGAAAAAGGTTGGTGA.
```

The synthetic gene was assembled from five oligonucleotides (76 - 90 bases in length, overlaps between 17 and 20 bases) using the proofreading polymerase *Psu*, and amplified using two flanking primers and Taq polymerase.

**Table S1:** Hydrogen bond interactions involving the heme propionates, water molecules and proteins atoms found in the heme cavity of *P. laminosum* cytochrome  $c_6$  (chain A), *A. thaliana* cytochrome  $c_{6A}$  AA-variant (2ce0) and the V52Q-AA variant of *A. thaliana* cytochrome  $c_{6A}$ . For *P. laminosum* cytochrome  $c_6$  the bond lengths of coordinating atoms to a zinc ion found in close proximity to the heme 6-propionate are also reported.

| Atom                       | <i>Pl</i> cyt $c_6^a$                                                                        | <i>At</i> cyt $c_{6A}$ (AA)                            | <i>At</i> cyt $c_{6A}$ V52Q-AA                              |
|----------------------------|----------------------------------------------------------------------------------------------|--------------------------------------------------------|-------------------------------------------------------------|
| HP 6-O2D                   | N27 (N $^{\delta 2}$ ), 3.6 Å<br>w28, 2.4 Å                                                  | Q28 (N $^{\epsilon 2}$ ), 3.1 Å<br>w44, 2.7 Å          | Q28 (N $^{\epsilon 2}$ ), 3.1 Å<br>w196, 3.6 Å <sup>d</sup> |
| HP 6-O1D                   | w26, 2.5 Å <sup>b</sup><br>K30 (N $^{\zeta}$ ), 2.7 Å                                        | w131, 2.7 Å <sup>b</sup><br>K30 (N $^{\zeta}$ ), 2.7 Å | w19, 3.8 Å <sup>b</sup>                                     |
| HP 7-O2A                   | w26, 3.8 Å <sup>b</sup><br>w17, 2.7 Å <sup>c</sup>                                           | w131, 2.9 Å <sup>b</sup>                               | w19, 3.3 Å <sup>b</sup><br>w196, 3.2 Å <sup>d</sup>         |
| HP 7-O1A                   |                                                                                              | N41 (N $^{\delta 2}$ ), 3.3 Å                          | N41 (N $^{\delta 2}$ ), 3.0 Å                               |
| Q52 (51) O $^{\epsilon 1}$ |                                                                                              |                                                        | w103, 3.0 Å                                                 |
| Q52 (51) N $^{\epsilon 2}$ | w26, 2.9 Å <sup>b</sup><br>CHA, 3.0 Å <sup>e</sup>                                           |                                                        | w19, 2.6 Å <sup>b</sup><br>CHA, 3.4 Å <sup>e</sup>          |
| Zn                         | N27 (O $^{\delta 1}$ ), 2.2 Å<br>E29 (O $^{\epsilon 1}$ ), 1.9 Å<br>w55, 2.3 Å<br>w21, 2.3 Å |                                                        |                                                             |

<sup>a</sup>Chain A used. <sup>b</sup>Conserved water molecule found in all known structures of cyts  $c_6$  bridging the heme propionates. <sup>c</sup>H-bonds also to w26 not found in other cyt  $c_6$  structures. <sup>d</sup>A second bridging water molecule between the heme propionates in the V52Q structure. <sup>e</sup>A non-hydrogen bonding interaction with the meso carbon of the porphyrin ring.
